# Supplementary material
Source: publisher site journal article supplement (https://www.dovepress.com/article/279955)
Supplement: Supplementary file 1 [file get_supplementary_file.php]

**Supplementary Table 1.** Model formula of the Diltiazem tablet

| **Name** | **Goal** | **Lower Limit** | **Upper Limit** |
| --- | --- | --- | --- |
| **Factor A (Karaya)** | in range | 30 | 90 |
| **Factor B (LB)** | in range | 20 | 40 |
| **Rel 1hr (Y1)** | minimize | 22.68 | 25 |
| **Rel 12hr (Y2)** | in range | 80 | 102.72 |
| **n (Y3)** | in range | 0.4 | 0.46 |
| **T50% (Y4)** | in range | 3.5 | 4.64 |
